# Supplementary material for: The GO/rGO–Fe3O4 composites with good water-dispersibility and fast magnetic response for effective immobilization and enrichment of biomolecules
Source: Royal Society of Chemistry journal article supplement (doi:10.1039/c2jm33695b), 2012-01-01
Supplement: c2jm33695b.pdf [file c2jm33695b.pdf]

## Supporting Information

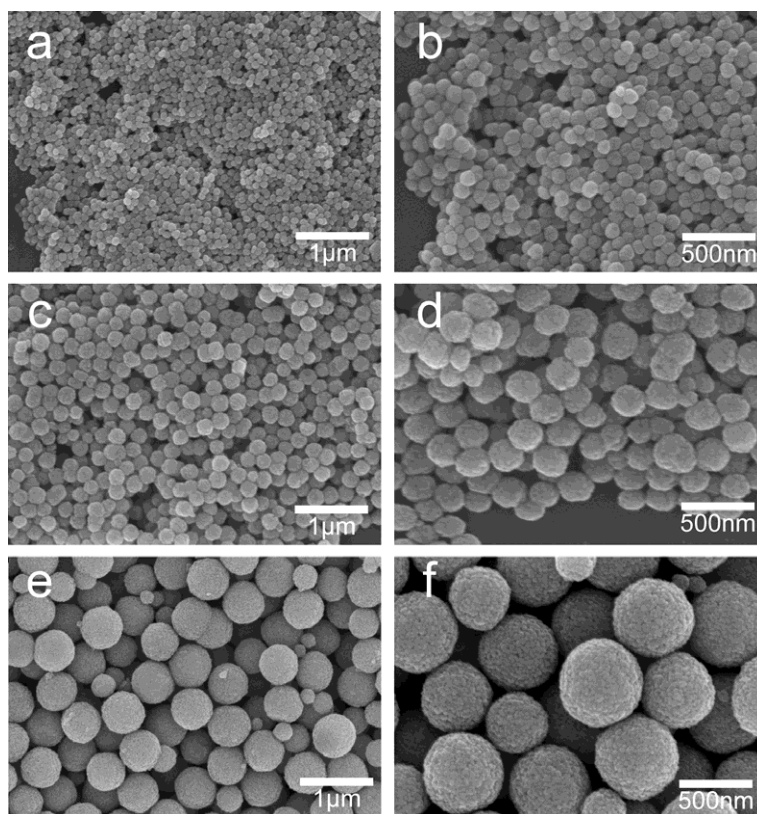

**Fig. S1** SEM images of the precursor  $\text{Fe}_3\text{O}_4$  particles with different size: 60 nm (a and b), 200 nm (c and d) and 500 nm (e and f).

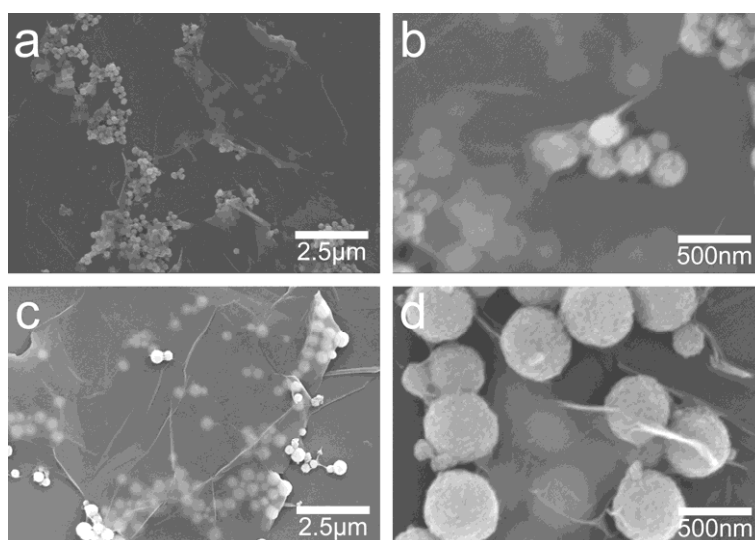

**Fig. S2** SEM images of prepared GO- $\text{Fe}_3\text{O}_4$  with different precursor  $\text{Fe}_3\text{O}_4$  particles: 200 nm (a and b) and 500 nm (c and d).

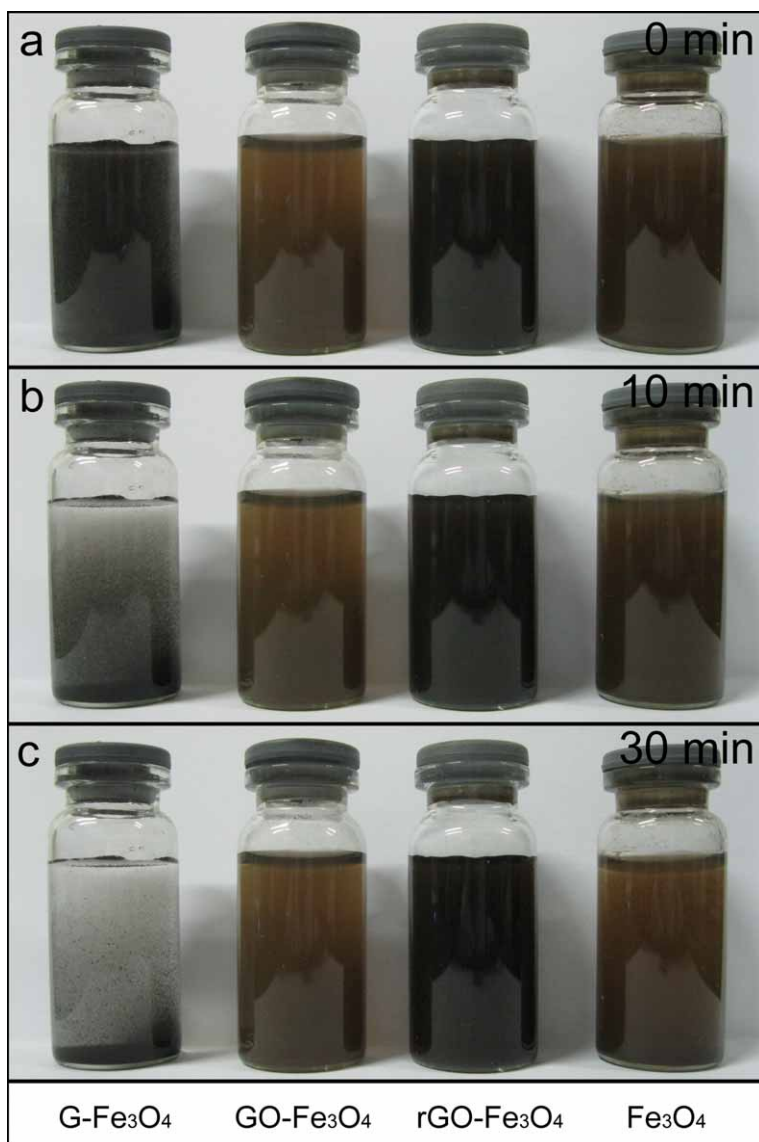

**Fig. S3** Photos of the dispersion of graphene-Fe<sub>3</sub>O<sub>4</sub> composites (G-Fe<sub>3</sub>O<sub>4</sub>) prepared using the solvothermal route, the dispersion of Fe<sub>3</sub>O<sub>4</sub> particles, the dispersion of as-prepared GO-Fe<sub>3</sub>O<sub>4</sub> composites and the dispersion of as-prepared GO-Fe<sub>3</sub>O<sub>4</sub> composites.

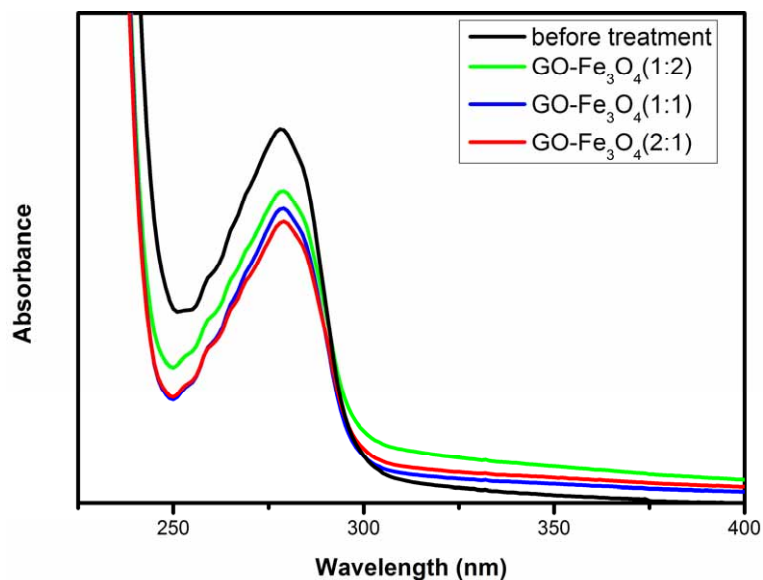

**Fig. S4** Adsorption of BSA protein solution before and after treatment by GO-Fe<sub>3</sub>O<sub>4</sub> composites with different ratios of GO to Fe<sub>3</sub>O<sub>4</sub>. The initial concentration of protein solution was 1 mg mL<sup>-1</sup> and the concentration of GO-Fe<sub>3</sub>O<sub>4</sub> composites was 1 mg mL<sup>-1</sup>.

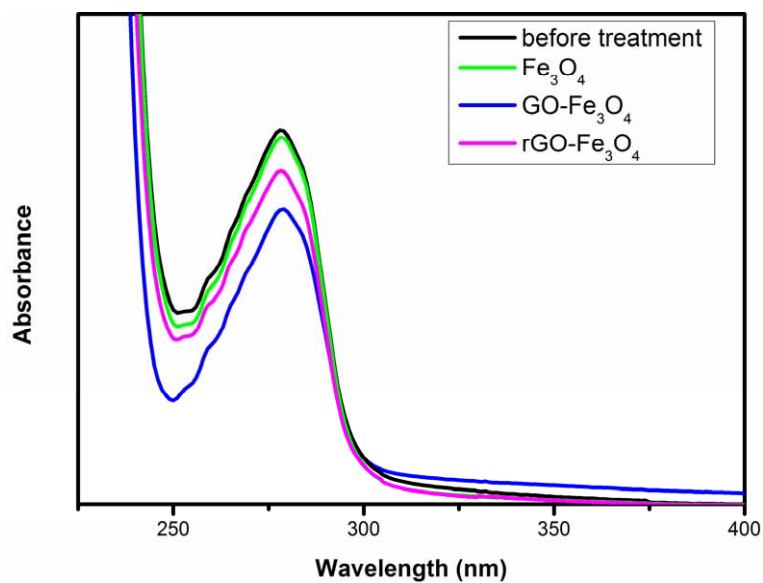

**Fig. S5** Adsorption of BSA protein solution before and after treatment by Fe<sub>3</sub>O<sub>4</sub> particles, GO-Fe<sub>3</sub>O<sub>4</sub> and rGO-Fe<sub>3</sub>O<sub>4</sub> composites. The initial concentration of protein solution was 1 mg mL<sup>-1</sup> and the concentration of Fe<sub>3</sub>O<sub>4</sub> particles, GO-Fe<sub>3</sub>O<sub>4</sub> and rGO-Fe<sub>3</sub>O<sub>4</sub> composites was 1 mg mL<sup>-1</sup>.

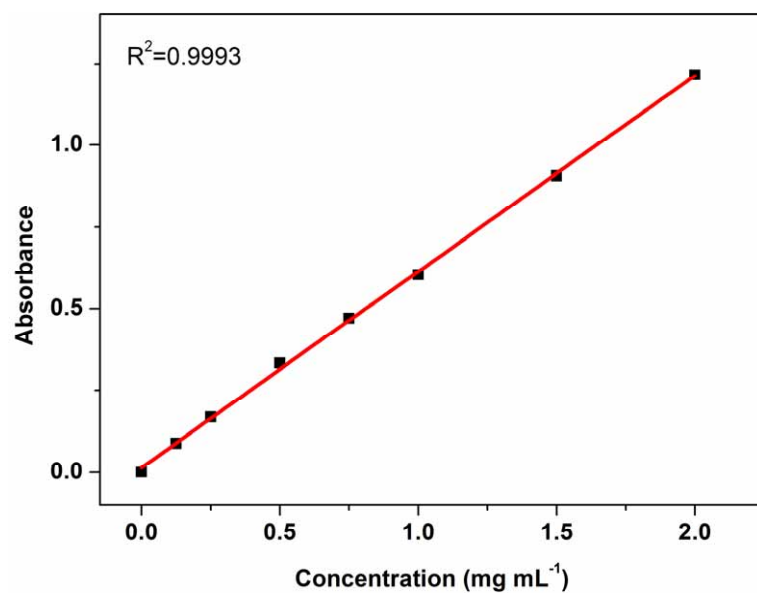

**Fig. S6** Calibration curve of the absorbance at 280 nm versus the BSA concentrations.

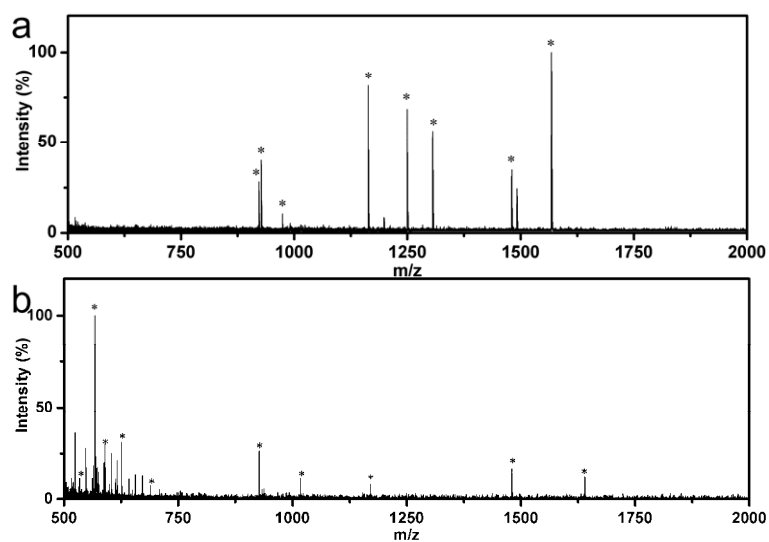

**Fig. S7** MALDI-TOF mass spectra of the diluted digest of BSA (5 fmol  $\mu\text{L}^{-1}$ ) after enrichment using (a) the Fe<sub>3</sub>O<sub>4</sub> particles and (b) commercial Zip-TipC18 pipette tip.

**Table S1** The search results of the tryptic digest of BSA before and after enrichment by rGO- Fe<sub>3</sub>O<sub>4</sub> hybrids, Zip-TipC18 pipette tip.

| AA                    | Mr(calc)  | Peptide sequences | None | Fe <sub>3</sub> O <sub>4</sub> | rGO-Fe <sub>3</sub> O <sub>4</sub> | ZipTipC18 |
|-----------------------|-----------|-------------------|------|--------------------------------|------------------------------------|-----------|
| 24–28                 | 655.3402  | RRDTHKS           |      |                                | √                                  | √         |
| 29–34                 | 711.3664  | KSEIAHRF          |      |                                | √                                  |           |
| 35–44                 | 1249.6000 | RFKDLGEEHFKG      |      | √                              |                                    |           |
| 37–44                 | 973.4505  | KDLGEEHFKG        |      | √                              | √                                  |           |
| 66–75                 | 1162.6234 | KLVNELTEFAKT      |      | √                              | √                                  |           |
| 152–156               | 589.3071  | KADEKKF           |      |                                | √                                  | √         |
| 157–160               | 536.2747  | KFWGKY            | √    |                                | √                                  | √         |
| 161–167               | 926.4861  | KYLYEIARR         |      | √                              | √                                  | √         |
| 223–228               | 648.3265  | RCASIQKF          | √    |                                | √                                  |           |
| 229–232               | 507.2441  | KFGERA            |      |                                | √                                  |           |
| 233–241               | 1000.5818 | RALKAWSVARL       |      |                                | √                                  |           |
| 236–241               | 688.3656  | KAWSVARL          |      |                                | √                                  | √         |
| 249–256               | 921.4807  | KAEFVEVTKL        |      | √                              | √                                  |           |
| 310–318               | 1014.4804 | KSHCIAEVEKD       |      |                                | √                                  | √         |
| 347–359               | 1567.7000 | KDAFLGSFLYEYSRR   |      | √                              |                                    |           |
| 402–412               | 1304.7088 | KHLVDEPQNLIKQ     |      | √                              | √                                  |           |
| 421–433               | 1478.7881 | KLGEYGFQNALIVRY   |      | √                              | √                                  | √         |
| 434–437               | 566.3176  | RYTRKV            | √    |                                | √                                  | √         |
| 437–451               | 1638.9305 | RKVPQVSTPTLVEVSRS |      |                                | √                                  | √         |
| 499–507               | 1023.4477 | KCTESLVNRR        |      |                                | √                                  |           |
| 549–557               | 1013.6121 | KQTALVELLKH       |      |                                | √                                  |           |
| Peptides matched      |           |                   | 3    | 8                              | 19                                 | 9         |
| Sequence coverage (%) |           |                   | -    | 11                             | 21                                 | 11        |
